# Supplementary material for: Porosity driven photocatalytic activity of wormhole mesoporous TiO2-xNx in direct sunlight
Source: Royal Society of Chemistry journal article supplement (doi:10.1039/c0jm03825c), 2011-01-01
Supplement: c0jm03825c.pdf [file c0jm03825c.pdf]

## Electronic Supporting Information

### Porosity driven photocatalytic activity of wormhole mesoporous $\text{TiO}_{2-x}\text{N}_x$ in direct sunlight

K. Sivaranjani, C. S. Gopinath

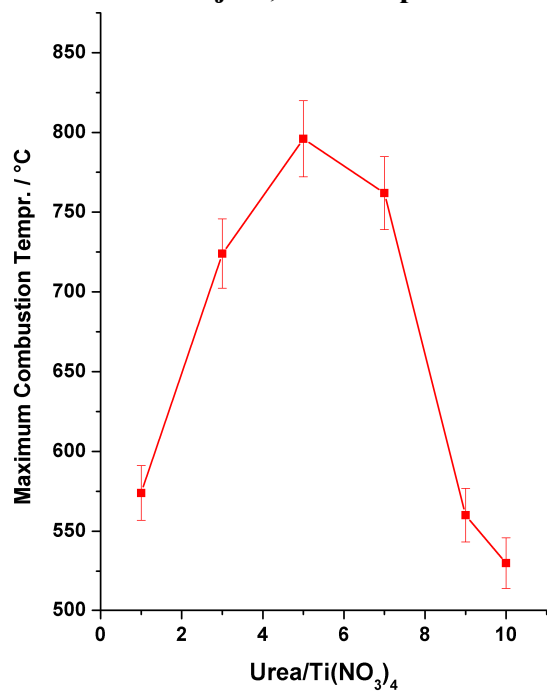

Figure S1: Maximum combustion temperature measured for various urea to Ti(NO<sub>3</sub>)<sub>4</sub> ratios.

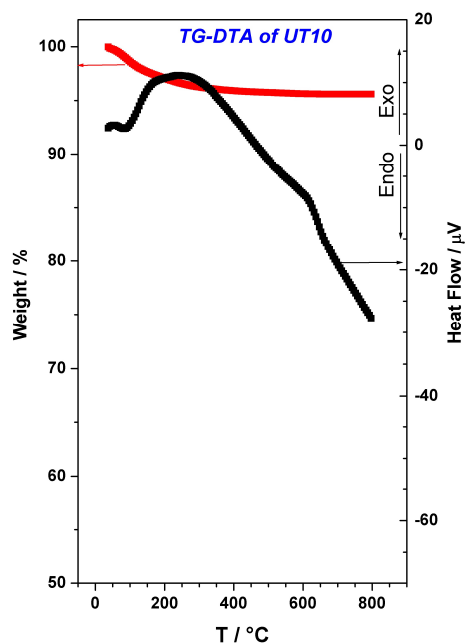

Figure S2: Thermogravimetric and differential thermal analysis of UT10 measured in an air atmosphere at a heating rate of 10°C/min. No weight loss and exothermic peaks above 180°C indicates the absence of any organic impurity.
